# Supplementary material for: Evaluation of the value of conventional and unconventional lipid parameters for predicting the risk of diabetes in a non-diabetic population
Source: PubMed Central journal article supplement (PMC9188037; doi:10.1186/s12967-022-03470-z), 2022-06-11
Supplement: 12967_2022_3470_MOESM2_ESM.pdf [file 12967_2022_3470_MOESM2_ESM.pdf]

# DM

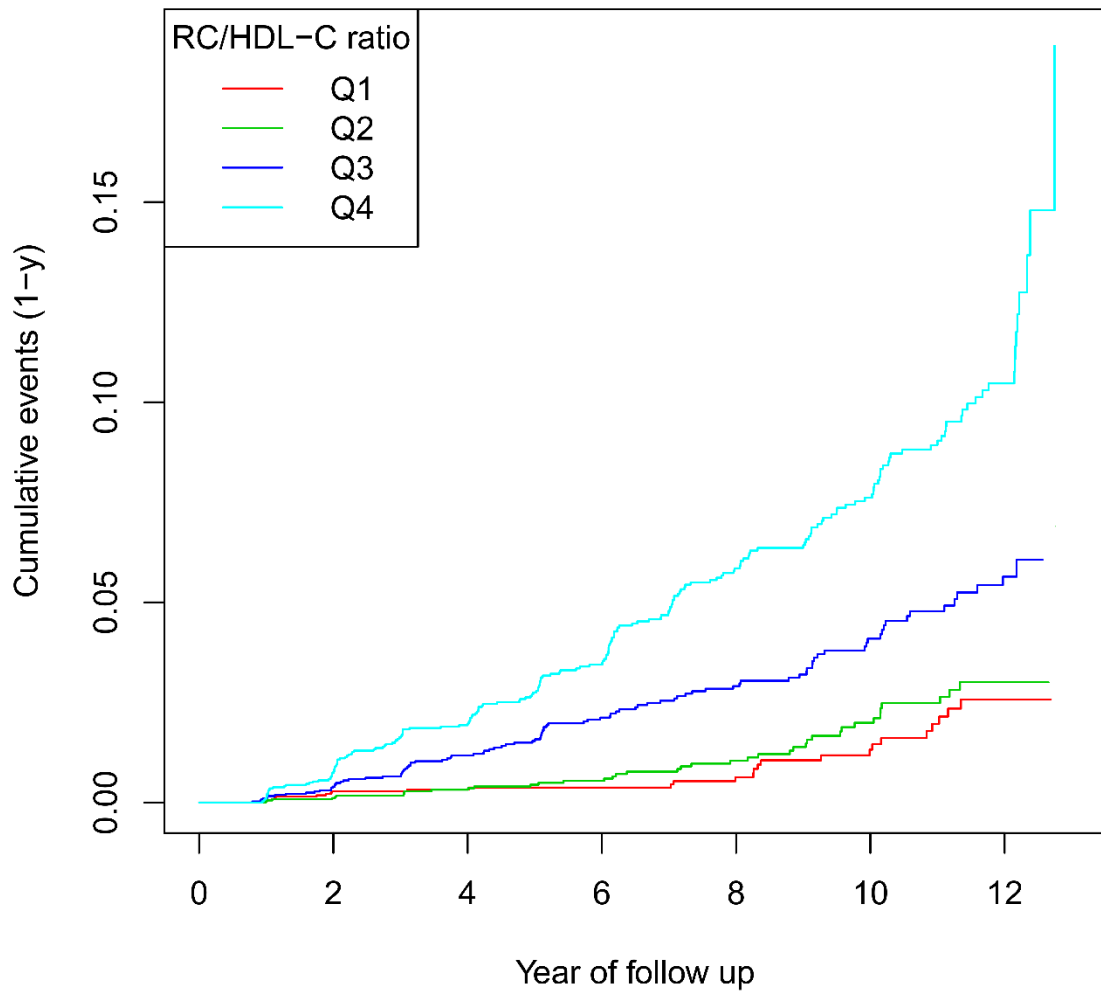

Figure S1: Proportional hazards assumption checking.

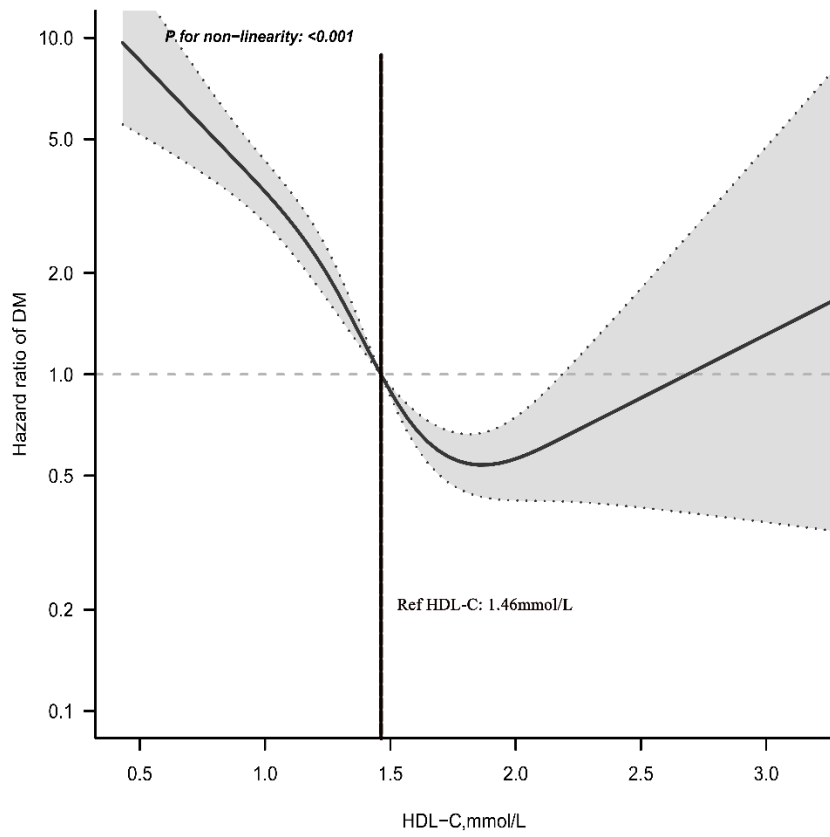

Figure S2(A): RCS evaluates the best threshold of HDL-C for predicting future diabetes risk.

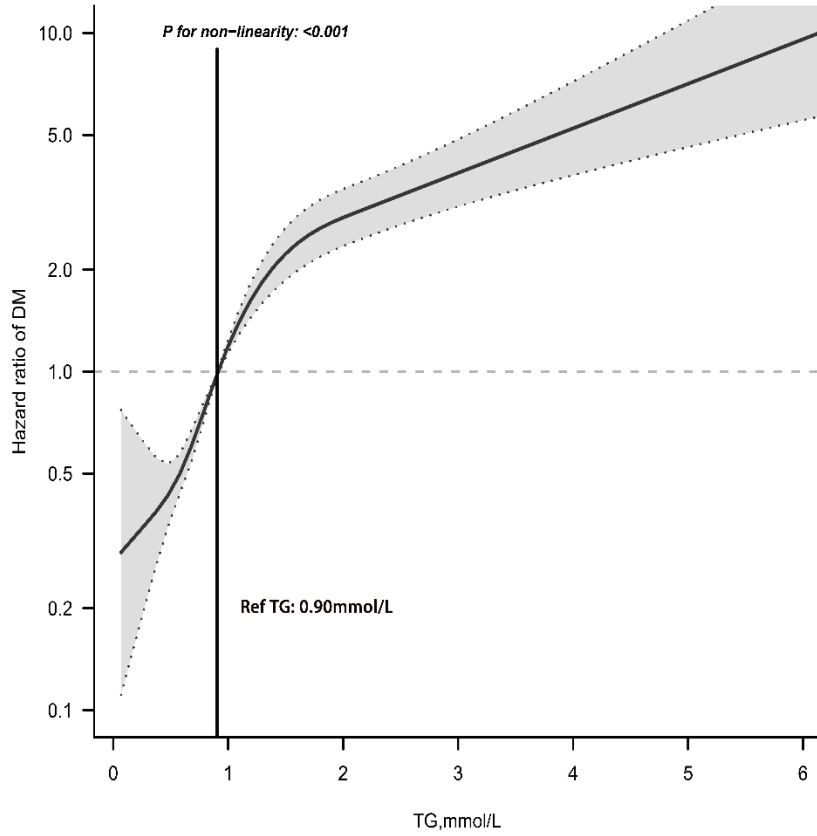

Figure S2(B): RCS evaluates the best threshold of TG for predicting future diabetes risk.

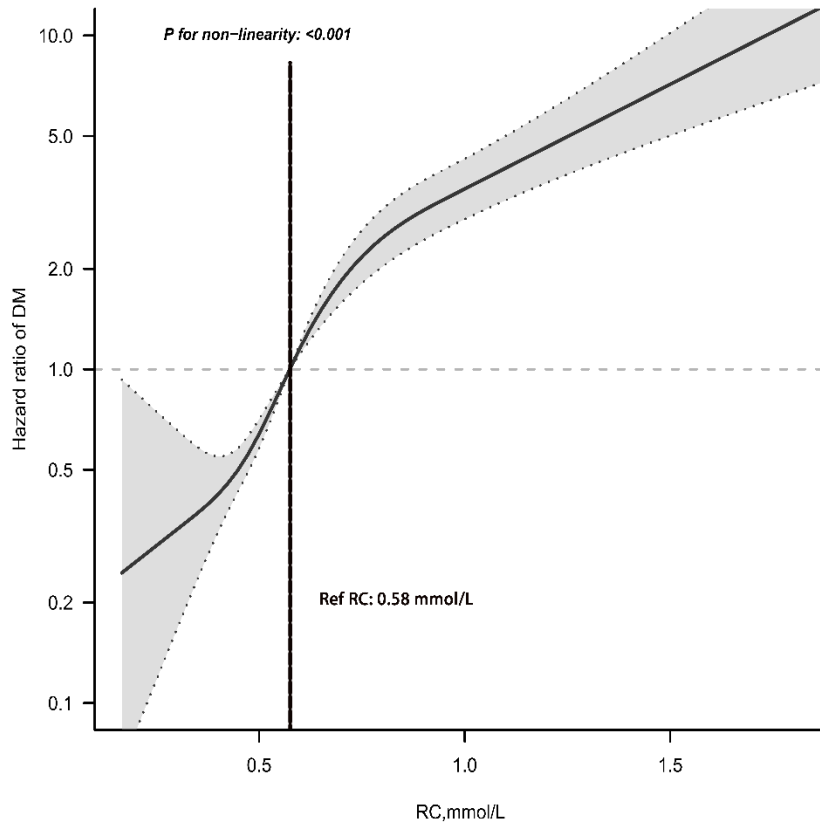

Figure S2(C): RCS evaluates the best threshold of RC for predicting future diabetes risk.

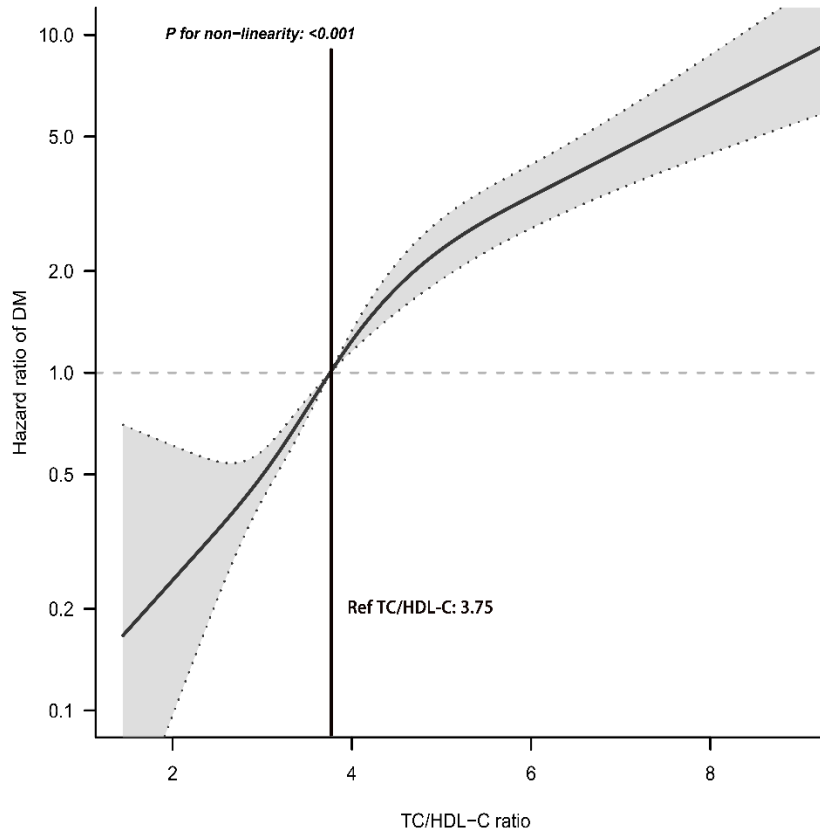

Figure S2(D): RCS evaluates the best threshold of TC/HDL-C ratio for predicting future diabetes risk.

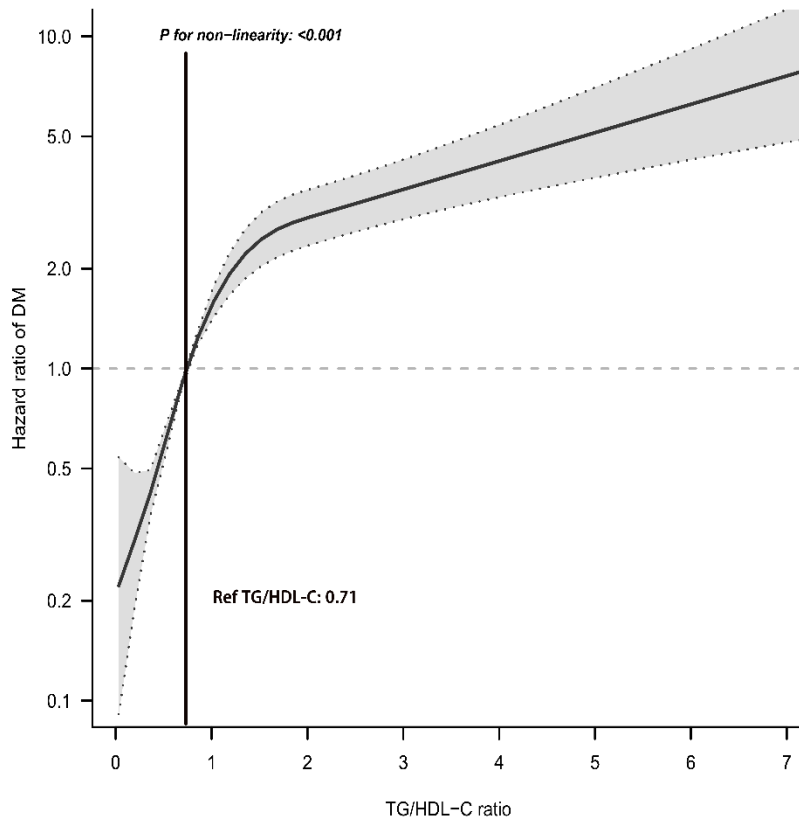

Figure S2(E): RCS evaluates the best threshold of TG/HDL-C ratio for predicting future diabetes risk.

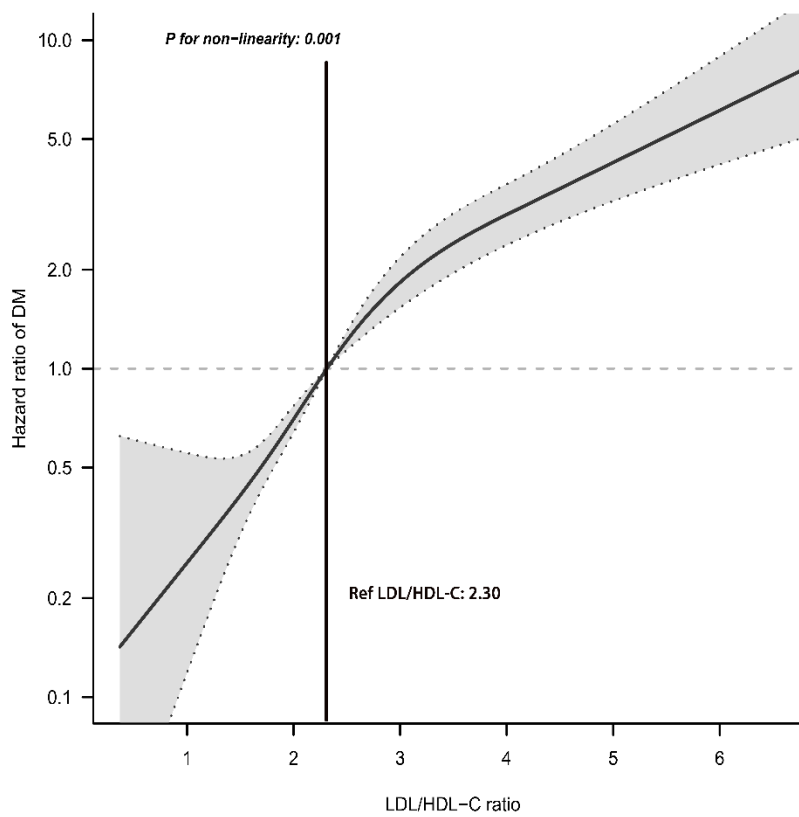

Figure S2(F): RCS evaluates the best threshold of LDL/HDL-C ratio for predicting future diabetes risk.

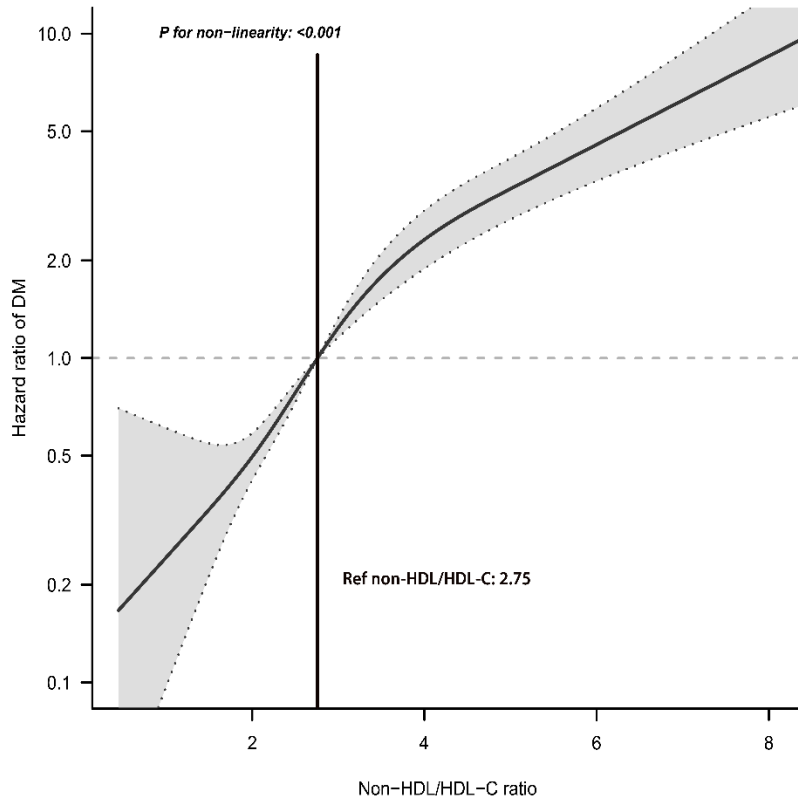

Figure S2(G): RCS evaluates the best threshold of non-HDL/HDL-C ratio for predicting future diabetes risk.

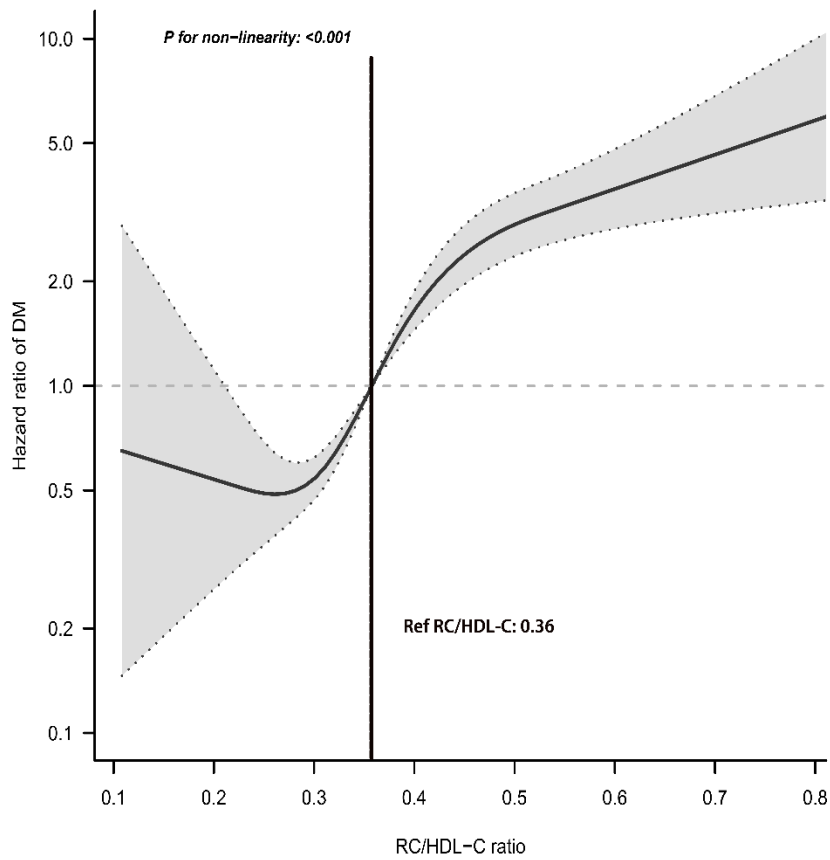

Figure S2(H): RCS evaluates the best threshold of RC/HDL-C ratio for predicting future diabetes risk.
