# Supplementary material for: Evaluation of the value of conventional and unconventional lipid parameters for predicting the risk of diabetes in a non-diabetic population
Source: PubMed Central journal article supplement (PMC9188037; doi:10.1186/s12967-022-03470-z), 2022-06-11
Supplement: 12967_2022_3470_MOESM3_ESM.pdf [file 12967_2022_3470_MOESM3_ESM.pdf]

Table S1: Pearson correlation Analysis of baseline conventional and unconventional lipid parameters and METS-IR.

|                     | Correlation | 95%CI low | 95%CI upp | P-value |
|---------------------|-------------|-----------|-----------|---------|
| HDL-C               | -0.7139     | -0.7216   | -0.7061   | <0.0001 |
| TG                  | 0.6460      | 0.6367    | 0.6551    | <0.0001 |
| TC                  | 0.1680      | 0.1526    | 0.1833    | <0.0001 |
| LDL-C               | 0.3823      | 0.3687    | 0.3956    | <0.0001 |
| RC                  | 0.6383      | 0.6289    | 0.6476    | <0.0001 |
| Non-HDL/C ratio     | 0.4653      | 0.4529    | 0.4776    | <0.0001 |
| TC/HDL-C ratio      | 0.7324      | 0.7250    | 0.7396    | <0.0001 |
| TG/HDL-C ratio      | 0.7447      | 0.7376    | 0.7517    | <0.0001 |
| Non-HDL/HDL-C ratio | 0.7318      | 0.7244    | 0.7390    | <0.0001 |
| LDL/HDL-C ratio     | 0.7049      | 0.6969    | 0.7128    | <0.0001 |
| RC/HDL-C ratio      | 0.7139      | 0.7061    | 0.7216    | <0.0001 |

Abbreviations as in Table 1.

Table S2: Collinearity diagnostics steps.

|                     | VIF   |       |       |       |       |       |       |      |      |      |      |      |
|---------------------|-------|-------|-------|-------|-------|-------|-------|------|------|------|------|------|
|                     | Step  | Step  | Step  | Step  | Step  | Step  | Step  | Step | Step | Step | Step | Step |
|                     | 1     | 2     | 3     | 4     | 5     | 6     | 7     | 8    | 9    | 10   | 11   | 12   |
| Sex                 | 3.3   | 3.3   | 3.3   | 3.3   | 3.3   | 3.3   | 3.2   | 3.2  | 3.2  | 3.2  | 3.2  | 3.2  |
| Age                 | 1.4   | 1.4   | 1.4   | 1.4   | 1.4   | 1.4   | 1.4   | 1.4  | 1.4  | 1.4  | 1.3  | 1.3  |
| Fatty liver         | 1.6   | 1.6   | 1.6   | 1.6   | 1.6   | 1.6   | 1.6   | 1.6  | 1.6  | 1.6  | 1.6  | 1.6  |
| Height              | 52.9  | 52.9  | 52.9  | 52.9  | 52.9  | 52.9  | 52.9  | 2.8  | 2.8  | 2.8  | 2.4  | 2.4  |
| Weight              | 170.9 | 170.9 | 170.9 | 170.9 | 170.9 | 170.9 | 170.9 | NA   | NA   | NA   | NA   | NA   |
| BMI                 | 96.9  | 96.9  | 96.9  | 96.9  | 96.9  | 96.9  | 96.9  | 5.1  | 5    | 5    | 1.8  | 1.8  |
| WC                  | 6     | 6     | 6     | 6     | 6     | 6     | 6     | 6    | 6    | 6    | NA   | NA   |
| ALT                 | 4.2   | 4.2   | 4.2   | 4.2   | 4.2   | 4.2   | 4.2   | 4.2  | 4.2  | 4.2  | 4.2  | 4.1  |
| AST                 | 3.3   | 3.3   | 3.3   | 3.3   | 3.3   | 3.3   | 3.3   | 3.3  | 3.3  | 3.3  | 3.3  | 3.3  |
| GGT                 | 1.5   | 1.5   | 1.5   | 1.5   | 1.5   | 1.5   | 1.5   | 1.5  | 1.5  | 1.5  | 1.5  | 1.5  |
| HDL-C               | Inf   | NA    | NA    | NA    | NA    | NA    | NA    | NA   | NA   | NA   | NA   | NA   |
| TC                  | Inf   | 47.8  | 47.8  | 47.8  | 47.8  | 47.8  | 39    | 38.9 | 17   | 2.7  | 2.7  | 2.7  |
| TG                  | Inf   | Inf   | NA    | NA    | NA    | NA    | NA    | NA   | NA   | NA   | NA   | NA   |
| LDL-C               | Inf   | Inf   | Inf   | NA    | NA    | NA    | NA    | NA   | NA   | NA   | NA   | NA   |
| Non-HDL-C           | Inf   | Inf   | Inf   | 86.6  | 86.6  | 86.6  | 50.7  | 50.4 | NA   | NA   | NA   | NA   |
| RC                  | Inf   | Inf   | Inf   | 40.5  | 40.5  | 40.5  | 4.9   | 4.9  | 4.6  | 3.8  | 3.8  | 3.8  |
| TC/HDL-C ratio      | Inf   | Inf   | Inf   | Inf   | NA    | NA    | NA    | NA   | NA   | NA   | NA   | NA   |
| TG/HDL-C ratio      | Inf   | Inf   | Inf   | Inf   | Inf   | NA    | NA    | NA   | NA   | NA   | NA   | NA   |
| LDL/HDL-C ratio     | Inf   | Inf   | Inf   | Inf   | Inf   | 828.8 | 40.7  | 40.7 | 32.4 | NA   | NA   | NA   |
| Non-HDL/HDL-C ratio | Inf   | Inf   | Inf   | Inf   | Inf   | 979.4 | NA    | NA   | NA   | NA   | NA   | NA   |
| RC/HDL-C ratio      | 38    | 38    | 38    | 38    | 38    | 38    | 31.5  | 31.5 | 31.5 | 2.5  | 2.5  | 2.5  |
| FPG                 | 1.5   | 1.5   | 1.5   | 1.5   | 1.5   | 1.5   | 1.5   | 1.5  | 1.5  | 1.5  | 1.5  | 1.5  |
| HbA1c               | 1.3   | 1.3   | 1.3   | 1.3   | 1.3   | 1.3   | 1.3   | 1.3  | 1.3  | 1.3  | 1.3  | 1.2  |
| SBP                 | 5.6   | 5.6   | 5.6   | 5.6   | 5.6   | 5.6   | 5.6   | 5.6  | 5.6  | 5.6  | 5.6  | 1.4  |
| DBP                 | 5.7   | 5.7   | 5.7   | 5.7   | 5.7   | 5.7   | 5.7   | 5.7  | 5.7  | 5.7  | 5.7  | NA   |
| Exercise habits     | 1     | 1     | 1     | 1     | 1     | 1     | 1     | 1    | 1    | 1    | 1    | 1    |
| Drinking status     | 1.3   | 1.3   | 1.3   | 1.3   | 1.3   | 1.3   | 1.3   | 1.3  | 1.3  | 1.3  | 1.3  | 1.3  |
| Smoking status      | 1.4   | 1.4   | 1.4   | 1.4   | 1.4   | 1.4   | 1.4   | 1.4  | 1.4  | 1.4  | 1.4  | 1.4  |

Abbreviations: Inf: infinity; VIF: Variance inflation factor; Other abbreviations as in Table 1.

Note:  $VIF = 1/(1-R^2)$ .
